# Supplementary material for: Automated Protein Subfamily Identification and Classification
Source: PLOS journal article supplement (doi:10.1371/journal.pcbi.0030160), 2007-08-15
Supplement: S1 (10.1371/journal.pcbi.0030160.s001) [file journal.pcbi.0030160.s001]

## S1 *De novo* subfamily identification on the EXPERT and EC datasets

We present the results for additional CD-HIT parameterizations not given in the main text (Table S1). The results continue the trends identified in the paper. CD-HIT 50 generally gives similar purity to SCI-PHY, but worse distance scores in every case except Enolase (for the edit distance) and NHR L3 (where it achieves the same VI distance). From these results, it appears that CD-HIT 60 provides a better overall breakdown than CD-HIT 70, since its purity scores are only slightly worse (and, interestingly, actually better for NHR Level 3), while its distance scores are significantly better. This reflects the diminishing returns in purity afforded by the higher percent identity parameterizations of CD-HIT. The NCUT algorithm (Abascal and Valencia, 2002) performed very inconsistently, and while its purity score of 0.875 for the aminergic GPCR family appears to be high, the one impur subfamily contained 89% of sequences in the family, including members of every level 1 subtype.

The expanded results include all CD-HIT parameterizations (Table S2), and are highly similar to the reported results in the text. The purity scores show diminishing returns as the identity threshold is raised, while the distance scores degrade significantly with each new level.

|               | Amine L1 | Amine L2 | Crotonase | Enolase | NHR L1 | NHR L2 | NHR L3 | Secretin |
|---------------|----------|----------|-----------|---------|--------|--------|--------|----------|
| Subtypes/Seqs | 7/358    | 31/358   | 10/365    | 8/472   | 8/412  | 27/412 | 77/412 | 15/153   |
| Pure/Total SF |          |          |           |         |        |        |        |          |
| SCI-PHY       | 36/37    | 32/37    | 15/16     | 26/26   | 29/29  | 28/29  | 11/29  | 14/16    |
| SECATOR       | 10/14    | 6/14     | 3/7       | 8/9     | 3/5    | 1/5    | 0/5    | 3/6      |
| NCUT          | 7/8      | 7/8      | 14/16     | 65/66   | 24/25  | 22/25  | 10/25  | 8/10     |
| CD-HIT 40     | 22/33    | 16/33    | 47/47     | 16/18   | 28/28  | 24/28  | 9/28   | 7/11     |
| CD-HIT 50     | 50/50    | 45/50    | 66/66     | 34/34   | 35/36  | 35/36  | 17/36  | 15/17    |
| CD-HIT 60     | 60/60    | 54/60    | 70/70     | 52/52   | 47/47  | 47/47  | 46/47  | 25/28    |
| CD-HIT 70     | 67/67    | 66/67    | 65/65     | 73/73   | 57/57  | 57/57  | 41/57  | 31/31    |
| CD-HIT 80     | 72/72    | 72/72    | 50/50     | 78/78   | 68/68  | 68/68  | 61/68  | 36/36    |
| CD-HIT 90     | 68/68    | 68/68    | 33/33     | 69/69   | 83/83  | 83/83  | 79/83  | 34/34    |
| Edit Distance |          |          |           |         |        |        |        |          |
| SCI-PHY       | 38       | 36       | 32        | 70      | 38     | 21     | 54     | 15       |
| SECATOR       | 49       | 61       | 53        | 32      | 6      | 23     | 71     | 9        |
| NCUT          | 40       | 62       | 23        | 99      | 30     | 23     | 57     | 14       |
| CD-HIT 40     | 64       | 84       | 55        | 28      | 30     | 21     | 69     | 25       |
| CD-HIT 50     | 55       | 51       | 112       | 52      | 44     | 25     | 64     | 18       |
| CD-HIT 60     | 74       | 64       | 160       | 99      | 64     | 45     | 68     | 30       |
| CD-HIT 70     | 107      | 85       | 213       | 177     | 90     | 71     | 70     | 35       |
| CD-HIT 80     | 142      | 118      | 264       | 252     | 133    | 114    | 89     | 50       |
| CD-HIT 90     | 205      | 181      | 312       | 343     | 212    | 193    | 154    | 82       |
| VI Distance   |          |          |           |         |        |        |        |          |
| SCI-PHY       | 1.55     | 0.90     | 1.05      | 1.37    | 1.62   | 0.39   | 0.95   | 0.56     |
| SECATOR       | 1.44     | 1.14     | 1.29      | 0.87    | 0.43   | 1.32   | 2.39   | 0.91     |
| NCUT          | 2.08     | 3.01     | 0.63      | 2.75    | 1.38   | 0.57   | 1.21   | 1.15     |
| CD-HIT 40     | 1.94     | 1.37     | 2.28      | 0.56    | 1.47   | 0.45   | 1.16   | 1.25     |
| CD-HIT 50     | 1.85     | 0.96     | 2.91      | 1.44    | 1.80   | 0.50   | 0.95   | 0.79     |
| CD-HIT 60     | 2.14     | 1.09     | 3.37      | 2.40    | 2.16   | 0.86   | 0.80   | 0.89     |
| CD-HIT 70     | 2.53     | 1.31     | 3.77      | 3.19    | 2.55   | 1.25   | 0.70   | 0.99     |
| CD-HIT 80     | 2.86     | 1.62     | 4.06      | 3.77    | 2.96   | 1.66   | 0.86   | 1.33     |
| CD-HIT 90     | 3.32     | 2.07     | 4.32      | 4.33    | 3.58   | 2.28   | 1.27   | 1.84     |
| Singletons    |          |          |           |         |        |        |        |          |
| SCI-PHY       | 6        | 6        | 22        | 52      | 17     | 17     | 17     | 6        |
| SECATOR       | 34       | 34       | 46        | 29      | 5      | 5      | 5      | 0        |
| NCUT          | 27       | 27       | 9         | 35      | 9      | 9      | 9      | 3        |
| CD-HIT 40     | 4        | 4        | 18        | 14      | 10     | 10     | 10     | 3        |
| CD-HIT 50     | 12       | 12       | 56        | 26      | 14     | 14     | 14     | 6        |
| CD-HIT 60     | 21       | 21       | 100       | 55      | 25     | 25     | 25     | 9        |
| CD-HIT 70     | 47       | 47       | 158       | 112     | 41     | 41     | 41     | 19       |
| CD-HIT 80     | 77       | 77       | 224       | 182     | 73     | 73     | 73     | 29       |
| CD-HIT 90     | 144      | 144      | 289       | 282     | 137    | 137    | 137    | 63       |

Table S1: *De novo* subfamily identification for the EXPERT set. We compared the performance of SCI-PHY, SECATOR and the six CD-HIT parameterizations on the eight functional classifications. Subtypes/Sequences: the number of expert-derived subtypes / the number of sequences in each classification. Pure/Total SF: the fraction of pure non-singleton subfamilies / the total number of non-singleton subfamilies for each method. Singletons: the number of single-sequence clusters for each method.

|          | SECATOR                       | SCI-PHY                                                                  | CDHIT 40                                                                 | CDHIT 50                                                                  | CDHIT 60                                                                  | CDHIT 70                                                                   | CDHIT 80                                                                   | CDHIT 90                                                                   |
|----------|-------------------------------|--------------------------------------------------------------------------|--------------------------------------------------------------------------|---------------------------------------------------------------------------|---------------------------------------------------------------------------|----------------------------------------------------------------------------|----------------------------------------------------------------------------|----------------------------------------------------------------------------|
| SECATOR  | P: 0.71<br>V: 0.91<br>E: 8.9  | (0.003)<br>0.018<br>0.005                                                | ( $1.9 \times 10^{-5}$ )<br>$4.0 \times 10^{-7}$<br>$6.3 \times 10^{-7}$ | ( $1.8 \times 10^{-7}$ )<br>$1.5 \times 10^{-9}$<br>$4.7 \times 10^{-8}$  | ( $2.6 \times 10^{-7}$ )<br>$1.0 \times 10^{-9}$<br>$5.0 \times 10^{-9}$  | ( $1.9 \times 10^{-7}$ )<br>$5.7 \times 10^{-10}$<br>$6.4 \times 10^{-10}$ | ( $1.9 \times 10^{-7}$ )<br>$4.1 \times 10^{-10}$<br>$4.4 \times 10^{-10}$ | ( $4.4 \times 10^{-7}$ )<br>$3.6 \times 10^{-10}$<br>$5.3 \times 10^{-10}$ |
| SCI-PHY  | P: 0.80<br>V: 1.07<br>E: 10.8 | (0.007)<br>$5.0 \times 10^{-8}$<br>$3.2 \times 10^{-6}$                  | ( $3.3 \times 10^{-6}$ )<br>$2.9 \times 10^{-8}$<br>$1.9 \times 10^{-9}$ | ( $3.3 \times 10^{-6}$ )<br>$4.4 \times 10^{-9}$<br>$6.9 \times 10^{-10}$ | ( $1.2 \times 10^{-6}$ )<br>$2.3 \times 10^{-9}$<br>$6.4 \times 10^{-10}$ | ( $1.2 \times 10^{-6}$ )<br>$9.1 \times 10^{-10}$<br>$6.2 \times 10^{-10}$ | ( $1.2 \times 10^{-6}$ )<br>$7.7 \times 10^{-10}$<br>$6.0 \times 10^{-10}$ |                                                                            |
| CDHIT 40 | P: 0.88<br>V: 1.44<br>E: 14.7 | ( $4.8 \times 10^{-5}$ )<br>$1.8 \times 10^{-4}$<br>$5.3 \times 10^{-7}$ | ( $2.0 \times 10^{-5}$ )<br>$2.6 \times 10^{-7}$<br>$1.4 \times 10^{-8}$ | ( $2.7 \times 10^{-6}$ )<br>$3.8 \times 10^{-8}$<br>$7.3 \times 10^{-9}$  | ( $6.6 \times 10^{-4}$ )<br>$9.1 \times 10^{-9}$<br>$8.8 \times 10^{-9}$  | ( $6.6 \times 10^{-4}$ )<br>$2.8 \times 10^{-9}$<br>$2.9 \times 10^{-9}$   | ( $0.001$ )<br>$2.5 \times 10^{-9}$<br>$2.5 \times 10^{-9}$                |                                                                            |
| CDHIT 50 | P: 0.94<br>V: 1.66<br>E: 19.4 | (0.002)<br>$5.8 \times 10^{-8}$<br>$2.5 \times 10^{-8}$                  | (0.002)<br>$5.8 \times 10^{-8}$<br>$2.5 \times 10^{-8}$                  | (0.002)<br>$5.8 \times 10^{-8}$<br>$2.5 \times 10^{-8}$                   | (0.002)<br>$5.8 \times 10^{-8}$<br>$2.5 \times 10^{-8}$                   | (0.002)<br>$5.8 \times 10^{-8}$<br>$2.5 \times 10^{-8}$                    | (0.002)<br>$5.8 \times 10^{-8}$<br>$2.5 \times 10^{-8}$                    |                                                                            |
| CDHIT 60 | P: 0.96<br>V: 1.89<br>E: 24.5 | (0.01)<br>$1.1 \times 10^{-7}$<br>$2.0 \times 10^{-8}$                   | (0.01)<br>$1.1 \times 10^{-7}$<br>$2.0 \times 10^{-8}$                   | (0.01)<br>$1.1 \times 10^{-7}$<br>$2.0 \times 10^{-8}$                    | (0.01)<br>$1.1 \times 10^{-7}$<br>$2.0 \times 10^{-8}$                    | (0.01)<br>$1.1 \times 10^{-7}$<br>$2.0 \times 10^{-8}$                     | (0.008)<br>$2.5 \times 10^{-9}$<br>$2.5 \times 10^{-9}$                    |                                                                            |
| CDHIT 70 | P: 0.97<br>V: 2.07<br>E: 30.0 | (0.03)<br>$6.5 \times 10^{-8}$<br>$5.4 \times 10^{-8}$                   | (0.03)<br>$6.5 \times 10^{-8}$<br>$5.4 \times 10^{-8}$                   | (0.03)<br>$6.5 \times 10^{-8}$<br>$5.4 \times 10^{-8}$                    | (0.03)<br>$6.5 \times 10^{-8}$<br>$5.4 \times 10^{-8}$                    | (0.03)<br>$6.5 \times 10^{-8}$<br>$5.4 \times 10^{-8}$                     | (0.06)<br>$2.7 \times 10^{-9}$<br>$5.2 \times 10^{-9}$                     |                                                                            |
| CDHIT 80 | P: 0.98<br>V: 2.23<br>E: 35.3 | P: 0.99<br>V: 2.35<br>E: 40.4                                            | P: 0.99<br>V: 2.35<br>E: 40.4                                            | P: 0.99<br>V: 2.35<br>E: 40.4                                             | P: 0.99<br>V: 2.35<br>E: 40.4                                             | P: 0.99<br>V: 2.35<br>E: 40.4                                              | P: 0.99<br>V: 2.35<br>E: 40.4                                              |                                                                            |
| CDHIT 90 | P: 0.99<br>V: 2.35<br>E: 40.4 | P: 0.99<br>V: 2.35<br>E: 40.4                                            | P: 0.99<br>V: 2.35<br>E: 40.4                                            | P: 0.99<br>V: 2.35<br>E: 40.4                                             | P: 0.99<br>V: 2.35<br>E: 40.4                                             | P: 0.99<br>V: 2.35<br>E: 40.4                                              | P: 0.99<br>V: 2.35<br>E: 40.4                                              |                                                                            |

Table S2: Wilcoxon signed rank tests for *de novo* subfamily detection on the EC dataset. Diagonal entries are the mean scores for the method. P: Purity score; 1.0 is perfect, indicating that all subfamilies contain sequences from a single EC class. V: Variation of information distance; E: edit distance. A distance of zero in either case indicates that predicted subfamilies are identical to EC classes. Upper-diagonal entries are the Wilcoxon signed rank p-values between methods for the corresponding score. In comparison of two methods for a particular score, parentheses around the p-value indicates that the method listed in the column is better; plain values indicate that the row method is better.
