# Supplementary material for: Automated Protein Subfamily Identification and Classification
Source: PLOS journal article supplement (doi:10.1371/journal.pcbi.0030160), 2007-08-15
Supplement: S6 (10.1371/journal.pcbi.0030160.s006) [file journal.pcbi.0030160.s006]

## S6 Annotation transfer and detecting annotation error

To illustrate biological discovery using our system of classification, we present several illustrations in which clustering sequences into SCI-PHY subfamilies enables functional assignment and detection of errors in function prediction.

By teasing apart subtypes within large protein families, our system enables both accurate function prediction and annotation error detection. For example, the amidohydrolase family of enzymes is a highly diverse group whose members exhibit a wide range of functions. SCI-PHY is able to separate these functions into discrete subfamilies, which can be used for functional annotation. Table S5 shows one subfamily from the SCI-PHY partition of the PhyloFacts book d1gkpa2 (available at [http://phylogenomics.berkeley.edu/book/book\\_info.php?book=d1gkpa2](http://phylogenomics.berkeley.edu/book/book_info.php?book=d1gkpa2)). homologs of the hydantoinase SCOP superfamily. Within this subfamily, protein P20051 has been annotated as a dihydroorotase using experimental evidence. The subfamily clustering system allows us to transfer this function to the unannotated sequences in the subfamily, for highly precise and accurate function prediction.

When a protein family contains multiple functions, it is quite easy for individual sequences to be misannotated, or annotated with a very general function. We provide an example in Table S6, again from the amidohydrolase family. Six sequences (shown in red) within this subfamily of guanine deaminases have been annotated as chlorohydrolases or “cytosine/guanine deaminases.” Based on the experimental evidence for sequences in the subfamily, these sequences are most likely misannotated. In addition, this example again highlights the effectiveness of SCI-PHY in facilitating annotation transfer: fifteen sequences without annotations in their description (and only high-level GO annotation) can be specifically labeled as guanine deaminases.

| Accession   | Source  | Description                                   | Species                   | GO function [evidence code]                               |
|-------------|---------|-----------------------------------------------|---------------------------|-----------------------------------------------------------|
| caa30444    | Genbank | unnamed protein product                       | Saccharomyces cerevisiae  |                                                           |
| P20051      | UniProt | Dihydroorotase (EC 3.5.2.3) (DHOase)          | Saccharomyces cerevisiae  | dihydroorotase activity [IMP]<br>protein binding [IPI]    |
| zp_00018287 | Genbank | hypothetical protein                          | Chloroflexus aurantiacus  |                                                           |
| Q9PIN6      | UniProt | Dihydroorotase (EC 3.5.2.3)                   | Campylobacter jejuni      | dihydroorotase activity [IEA]<br>hydrolase activity [IEA] |
| caa31733    | Genbank | hypothetical protein                          | Neurospora crassa         |                                                           |
| Q9UTI0      | UniProt | Probable dihydroorotase (EC 3.5.2.3) (DHOase) | Schizosaccharomyces pombe |                                                           |
| aam46078    | Genbank | dihydroorotase                                | Toxoplasma gondii         |                                                           |
| P31301      | UniProt | Dihydroorotase (EC 3.5.2.3) (DHOase)          | Ustilago maydis           |                                                           |

Table S5: The N1852 subfamily from the SCI-PHY partition of sequences in the PhyloFacts book d1gkpa2, a member of the hydantoinase SCOP superfamily. The evidence code for each GO annotation are given in brackets after the term. P20051 (blue) has been annotated as a dihydroorotase using experimental evidence, which can be transferred to unannotated proteins within the subfamily (green).

| Accession | Description                                                        | Species                            | GO function [evidence code]                               |
|-----------|--------------------------------------------------------------------|------------------------------------|-----------------------------------------------------------|
| Q831R9    | Chlorohydrolase family protein                                     | Enterococcus faecalis              | hydrolase activity [IEA]                                  |
| Q97MB6    | Cytosine/guanine deaminase related protein                         | Clostridium acetobutylicum         | hydrolase activity [IEA]                                  |
| Q2WNG6    | Cytosine/guanine deaminase related protein                         | Clostridium beijerincki NCIMB 8052 |                                                           |
| Q5AFN9    | Hypothetical protein                                               | Candida albicans                   |                                                           |
| Q6C4L7    | Similar to sp—Q07729 Saccharomyces cerevisiae YDL238c              | Yarrowia lipolytica                | hydrolase activity [IEA]                                  |
| Q5AX44    | Hypothetical protein                                               | Emmericella nidulans               |                                                           |
| Q2U0Q0    | Atrazine chlorohydrolase/guanine deaminase                         | Aspergillus oryzae                 |                                                           |
| Q4W9T7    | Chlorohydrolase family protein                                     | Aspergillus fumigatus              |                                                           |
| Q4IBT5    | Hypothetical protein                                               | Gibberella zeae                    |                                                           |
| Q7SA53    | Hypothetical protein                                               | Neurospora crassa                  |                                                           |
| Q6CQ62    | Similar to sp—Q07729 Saccharomyces cerevisiae YDL238c singleton    | Kluyveromyces lactis               | hydrolase activity [IEA]                                  |
| Q07729    | Probable guanine deaminase (EC 3.5.4.3)                            | Saccharomyces cerevisiae           | guanine deaminase activity [IDA]<br>protein binding [IPI] |
| Q6FWH8    | Similar to sp—Q07729 Saccharomyces cerevisiae YDL238c              | Candida glabrata                   | hydrolase activity [IEA]                                  |
| Q9VMY9    | CG18143-PA (LD44207p) (RE08243p)                                   | Drosophila melanogaster            | protein binding [IPI]                                     |
| Q7QI65    | ENSANGP00000019574 (Fragment)                                      | Anopheles gambiae str              |                                                           |
| Q4PAC0    | Hypothetical protein                                               | Ustilago maydis                    |                                                           |
| Q2UHY8    | Atrazine chlorohydrolase/guanine deaminase                         | Aspergillus oryzae                 |                                                           |
| Q4IIL7    | Hypothetical protein                                               | Gibberella zeae                    |                                                           |
| Q5AY15    | Hypothetical protein                                               | Emmericella nidulans               |                                                           |
| Q9WTT6    | Guanine deaminase (EC 3.5.4.3)                                     | Rattus norvegicus                  | guanine deaminase activity [IDA]                          |
| Q5RAV9    | Hypothetical protein                                               | Pongo pygmaeus                     | hydrolase activity [IEA]                                  |
| Q4SCM3    | Chromosome 12 SCAF14652, whole genome shotgun sequence. (Fragment) | Tetraodon nigroviridis             |                                                           |
| Q502E8    | Hypothetical protein                                               | Brachydanio rerio                  | hydrolase activity [IEA]                                  |

Table S6: SCI-PHY helps to identify potential annotation errors. A portion of one subfamily of guanine deaminases from the PFAM amidohydrolase family (Amidohydro\_1) is shown. Accession numbers in blue have experimental evidence of guanine deaminase activity. Accessions shown in red have been annotated with different functions and are potential misannotations. Accessions shown in green have no annotation (or only a very general GO annotation), and can be labeled as guanine deaminases. 17 sequences within this subfamily were labeled as guanine deaminases; these are not shown.
